# Supplementary material for: To Crowdfund Research, Scientists Must Build an Audience for Their Work
Source: PLOS journal article supplement (doi:10.1371/journal.pone.0110329), 2014-12-10
Supplement: S5 (10.1371/journal.pone.0110329.s005) [file journal.pone.0110329.s005]

Figure S5: Changes in the percentage of projects hitting 100% of their funding goal over the four rounds of the #SciFund Challenge run to date.

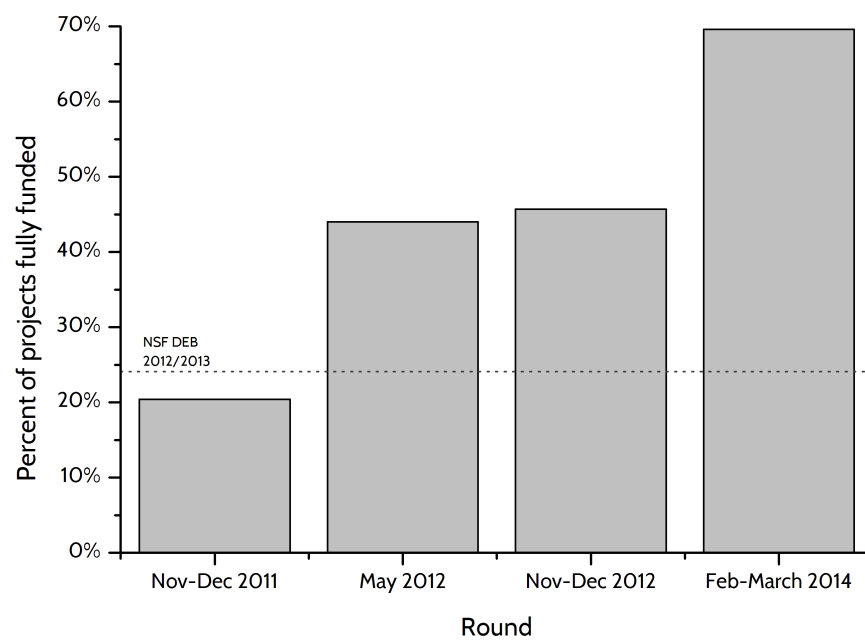

NSF DEB full proposal success rate from  
<https://nsfdeb.wordpress.com/2013/12/30/deb-numbers-fy2013-wrap-up/>
